# Supplementary material
Source: PubMed Central journal article supplement (PMC7762935)
Supplement: supp_RA120.015682_162977_2_supp_609293_qhw2gx.pdf [file supp_RA120.015682_162977_2_supp_609293_qhw2gx.pdf]

Supporting Information for

**NETosis Occurs Independently of Neutrophil Serine Proteases**

Paulina Kasperkiewicz<sup>a,b</sup>, Anne Hempel<sup>a</sup>, Tomasz Janiszewski<sup>b</sup>, Sonia Kołt<sup>b</sup>, Scott J. Snipas<sup>a</sup>, Marcin Drag<sup>b</sup>, Guy S. Salvesen<sup>a,\*</sup>

Guy S. Salvesen

Email: gsalvesen@sbpdiscovery.org

**This PDF file includes:**

Legends for Movies S1 to S3c

**Movie S1** Time course of NET formation in PMA-treated neutrophils co-incubated with a Cy5-labeled NE probe (red), and SYTOX Green™ to mark DNA.

**Movie S2** Nuclear DNA is contained within the nucleus during pyroptosis induced by treatment of macrophages by LPS and ATP, and SYTOX Green™ to mark DNA

**Movie S3a** Z-stack of fresh neutrophils stimulated with PMA to induce NETosis BODIPY-labeled NE probe (green) and propidium iodide (red) to visualize DNA

**Movie S3b** Z-stack of fresh neutrophils stimulated with PMA to induce NETosis BODIPY-labeled CatG probe (green) and propidium iodide (red) to visualize DNA

**Movie S3c** Z-stack of fresh neutrophils stimulated with PMA to induce NETosis BODIPY-labeled PR3 probe (green) and propidium iodide (red) to visualize DNA
